# Supplementary material for: Valle de Laciana: donde se esconde el urogallo
Source: Royal Society of Chemistry journal article supplement (doi:10.1039/d3an00011g), 2004-01-01
Supplement: d3an00011g1.pdf [file d3an00011g1.pdf]

## Supplementary Information

### Development of a modularized aptamer targeting the nuclear T-cell suppressor PAC1

Zixi Hu†, Zhongyu Jiang†, Zeliang Yang, Liang Liu, Zhenyu Zhu, Yan Jin, and Yuxin Yin\*

*Institute of Systems Biomedicine, Department of Pathology, School of Basic Medical Sciences, Peking-Tsinghua Center for Life Sciences, Beijing Key Laboratory of Tumor Systems Biology, Peking University Health Science Center, Beijing 100191, China.*

\* Corresponding author.

Institute of Systems Biomedicine, Peking University Health Science Center, Beijing 100191, P.R. China

Phone: (86) 10-8280-5570

Fax: (86) 10-8280-1380

E-mail: yinyuxin@hsc.pku.edu.cn

† First authors: These authors contributed equally to the work. Zixi Hu and Zhongyu Jiang

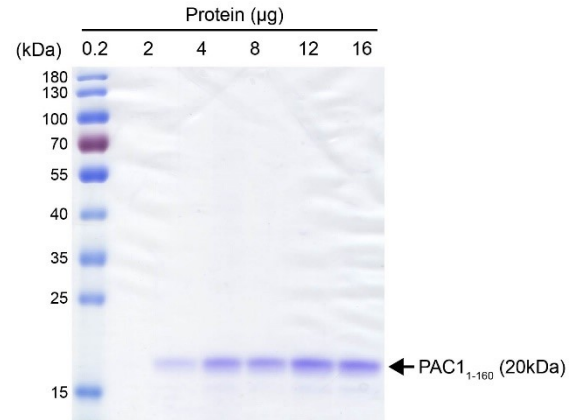

**Fig. S1** The incubation ratio of His-tagged PAC1<sub>1-160</sub> protein and Ni-beads was optimized.

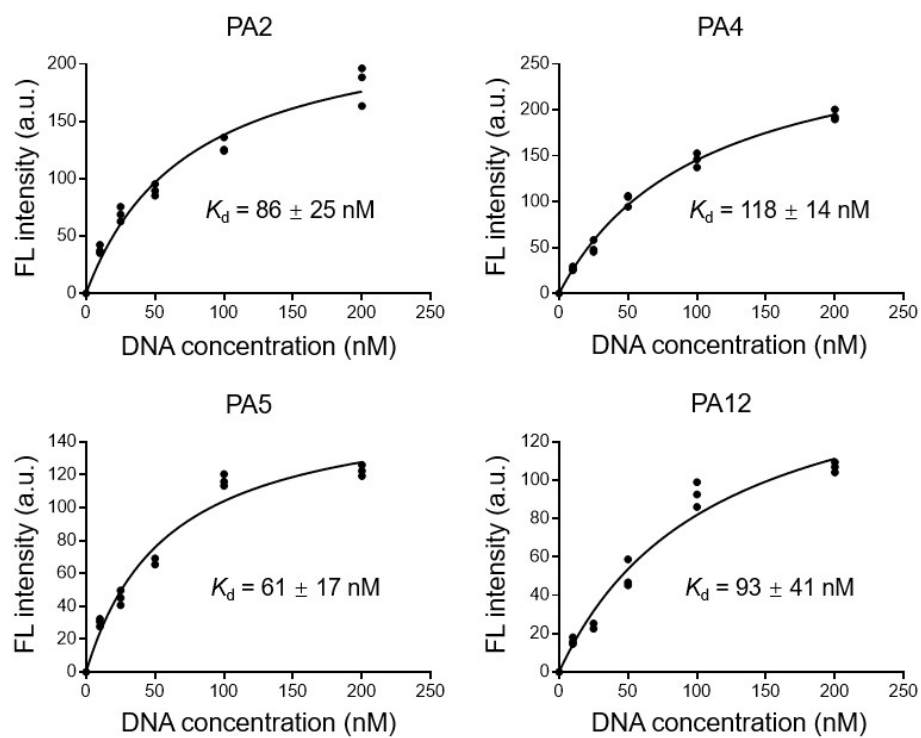

**Fig. S2** The  $K_d$  value of candidate aptamers PA2, PA4, PA5 and PA12.

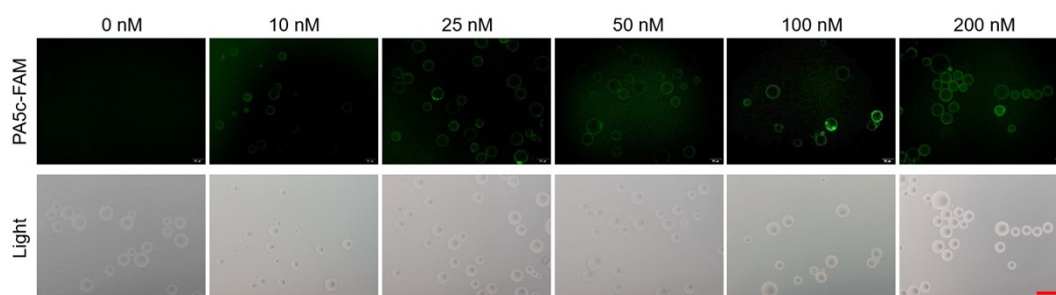

**Fig. S3** Inspected the binding ability of PA5c in different concentrations with P-beads by fluorescence microscopy. Scale bars: 100  $\mu$ m

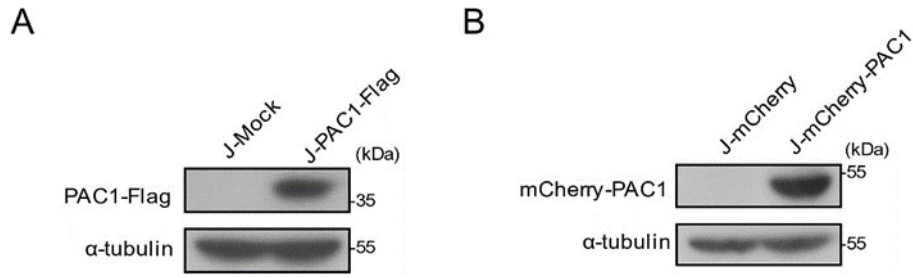

**Fig. S4** The expression of PAC1 in J-PAC1-Flag cells (A) and J-mCherry-PAC1 cells (B) compared to J-Mock.

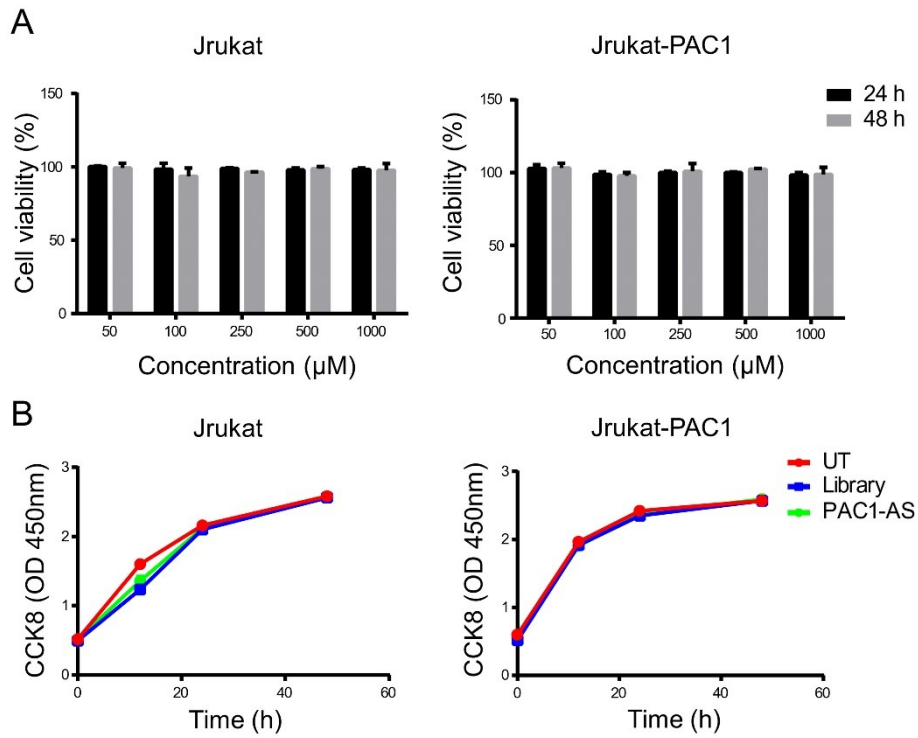

**Fig. S5** The toxicity of aptamer PAC1-AS-p to Jurkat and Jurkat-PAC1 cells was detected by CCK8 kit.

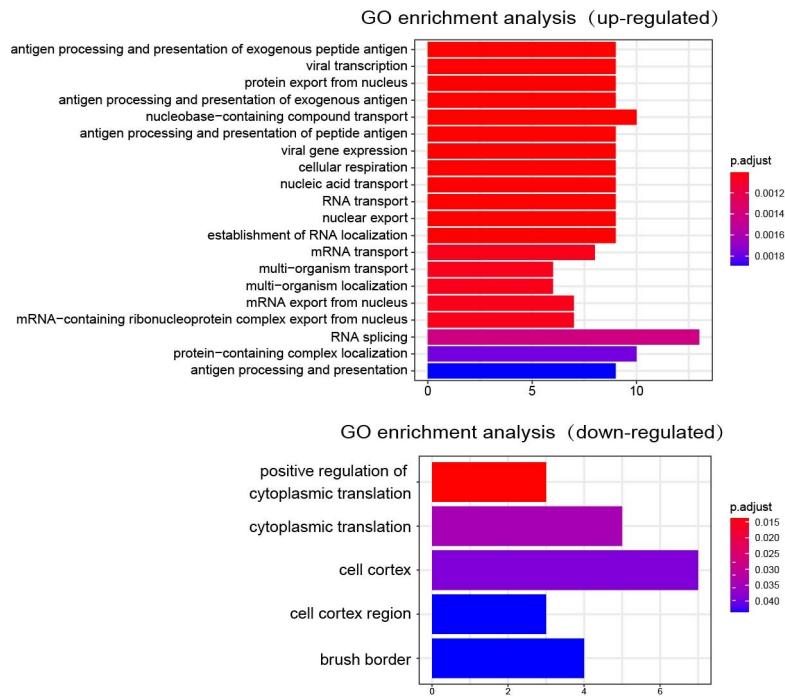

**Fig. S6** Jurkat cells untreated or stimulated with PMA plus ionomycin for 3 h. Mass spectrometry was used to identify the PAC1 interactome after treated with or without PAC1-AS. Then, the GO enrichment analysis up/down-regulated proteins from the data of mass spectrometry. All the target proteins in the GO enrichment analysis were significant ( $P < 0.05$ ). The abscissa represents the number of enriched proteins.

**Table. S1** Conditions used in SELEX.

| Round | Dosage of library (pmol) | Negative selection |                | Positive selection |                | Temperature (°C) | Washing buffer volume (mL) | PCR cycles |
|-------|--------------------------|--------------------|----------------|--------------------|----------------|------------------|----------------------------|------------|
|       |                          | Ni-beads (μL)      | duration (min) | Protein (μg)       | duration (min) |                  |                            |            |
| 1     | 5000                     | -                  | -              | 60                 | 60             | 4                | 1                          | 5          |
| 2     | 1000                     | -                  | -              | 60                 | 60             | 4                | 1                          | 7          |
| 3     | 500                      | -                  | -              | 60                 | 60             | 4                | 1                          | 7          |
| 4     | 200                      | 5                  | 30             | 30                 | 60             | 4                | 1 × 2                      | 7          |
| 5     | 200                      | 5                  | 40             | 30                 | 50             | 4                | 1 × 2                      | 11         |
| 6     | 200                      | 10                 | 50             | 30                 | 40             | 4                | 1 × 3                      | 7          |
| 7     | 200                      | 10                 | 60             | 30                 | 30             | 4                | 1 × 3                      | 7          |
| 8     | 200                      | 10                 | 60             | 30                 | 30             | 4                | 1 × 3                      | 7          |

**Table. S2** Sequences of aptamer candidates.

| Name | Sequence 5'-3'                                    | $K_d$           |
|------|---------------------------------------------------|-----------------|
|      | ATCCAGAGTGACGCAGCACCCACCCGCACG                    |                 |
| PA2  | TCATTTCCACCCTTCTCTACTTCTCTCTGGAC<br>ACGGTGGCTTAGT | $86 \pm 25$ nM  |
|      | ATCCAGAGTGACGCAGCACCTTACATCCCGC                   |                 |
| PA4  | ATACAGCCCGCTCACACCCTCCCTTAGTGGA<br>CACGGTGGCTTAGT | $118 \pm 14$ nM |
|      | ATCCAGAGTGACGCAGCACCTACATTCACCG                   |                 |
| PA5  | TCTCACTTCTCCCCTCTCGTTCCCCTCTGGAC<br>ACGGTGGCTTAGT | $61 \pm 17$ nM  |
|      | ATCCAGAGTGACGCAGCAGTGCTCGTGCCCC                   |                 |
| PA12 | CGTACCCTTGCTCTAGACCTCTCCCTCTGGAC<br>ACGGTGGCTTAGT | $93 \pm 41$ nM  |

**Table. S3** The truncated sequences of PA5.

| <b>Name</b>       | <b>Sequence 5'-3'</b>                                          |
|-------------------|----------------------------------------------------------------|
| PA5a<br>(1-58bp)  | ATCCAGAGTGACGCAGCACCTACATTCACCGTCTCAC<br>TTCTCCCCTCTCGTTCCCCTC |
| PA5b<br>(19-76bp) | CCTACATTCACCGTCTCACTTCTCCCCTCTCGTTCCCCT<br>CTGGACACGGTGGCTTAGT |
| PA5c<br>(19-58bp) | CCTACATTCACCGTCTCACTTCTCCCCTCTCGTTCCCCT<br>C                   |
| PA5d<br>(25-52bp) | TTCACCGTCTCACTTCTCCCCTCTCGTT                                   |



**Table. S4** Aptamer with artificial bases. (Phosphorodithiate, \*)

| <b>Name</b> | <b>Sequence 5'-3'</b>                                             |
|-------------|-------------------------------------------------------------------|
| AS1411-L    | <i>GCGTTTTCGCGGTGGTGGTGGTTGTGGTGGTGGTGG</i>                       |
| PA5c-L      | <i>GCGAAAACGCCCTACATTCACCGTCTCACTTCTCCCC<br/>TCTCGTTCCCCTC</i>    |
| AS1411-p    | <i>GCGTTTTCGCGGTGGTGGTGGTTGTGGTGGTGG*T*G*<br/>G</i>               |
| PA5c-p      | <i>GCGAAAACGCCCTACATTCACCGTCTCACTTCTCCCC<br/>TCTCGTTCCC*C*T*C</i> |

**Table. S5** The sequences of the qRT-PCR primers.

| <b>Name</b>     | <b>Sequence 5'-3'</b>     |
|-----------------|---------------------------|
| <i>Tnf</i> -F   | AACTTGTGTTTCACAGTCCGTTT   |
| <i>Tnf</i> -R   | GCCTCCCTCTCATCAGTTCTATG   |
| <i>Gzmb</i> -F  | GAGAGGACTTTGTGCTGACTGC    |
| <i>Gzmb</i> -R  | GCTGGGTCTTCTCCTGTTCTTTG   |
| <i>Il2</i> -F   | CGACCAGAACATCCAGAAGAAT    |
| <i>Il2</i> -R   | AGAGACATAAACAGCAGGTCCA    |
| <i>Ifng</i> -F  | GGGTTCTCTTGGCTGTTACT      |
| <i>Ifng</i> -R  | GAGTTCCATTATCCGCTACATCT   |
| <i>Pac1</i> -F  | CAAGAGTATCCCTGTGGAGGAC    |
| <i>Pac1</i> -R  | GAAACTGAAGTTGGGGGAGATG    |
| <i>Pd-1</i> -F  | CAGGATGGTTCTTAGACTCCC     |
| <i>Pd-1</i> -R  | GCTCATGCGGTACCAGTTTA      |
| <i>Ctla4</i> -F | CAGTGGAAATCAAGTGAACCTC    |
| <i>Ctla4</i> -R | GAGGAGGAAGTCAGAATCTGG     |
| <i>Tim3</i> -F  | GGAGCCTCCCTGATATAAATCTAAC |
| <i>Tim3</i> -R  | GCTCCGATGTAGATGCCTATTC    |
| <i>Tigit</i> -F | GCCAGGTTCCAGATTCCATT      |
| <i>Tigit</i> -R | GGATTCTGAGGGCTTTCTTCTT    |
| <i>Gapdh</i> -F | ACCCACTCCTCCACCTTTGA      |
| <i>Gapdh</i> -R | CTGTTGCTGTAGCCAAATTCGT    |
